# Supplementary material for: Wound Healing Potential of an Oleoresin Essential Oil Chemotype from Canarium schweinfurthii Engl
Source: MDPI journal article supplement (doi:10.3390/molecules27227966), 2022-11-17
Supplement: s1 [file s1]

*Supplementary Materials for*

## **Wound Healing Potential of an Oleoresin Essential Oil Chemotype from *Canarium schweinfurthii* Engl.**

**Michel Bonnard \*, Enzo Martin and Isabelle Parrot \***

\* Correspondence: [michel.bonnard@umontpellier.fr](mailto:michel.bonnard@umontpellier.fr) (M.B.); [isabelle.parrot-smietana@umontpellier.fr](mailto:isabelle.parrot-smietana@umontpellier.fr) (I.P.)

**Table S1.** Chemical composition of EO (% Area, non-polar phase) obtained from oleoresins of *C. schweinfurthii* collected in Gabon (Ntoum region, trees #1-#4).

| No. | Compounds                       | Composition (% Area) |         |         |         |
|-----|---------------------------------|----------------------|---------|---------|---------|
|     |                                 | Tree #1              | Tree #2 | Tree #3 | Tree #4 |
| 1   | $\alpha$ -thujene               | 0.28                 | 0.13    | 0.67    | 0.09    |
| 2   | $\alpha$ -pinene                | 5.69                 | 21.01   | 2.04    | 5.91    |
| 3   | camphene                        | 0.06                 | 0.13    | 0.04    | nd      |
| 4   | sabinene                        | 8.36                 | 4.22    | 20.13   | 1.58    |
| 5   | $\beta$ -pinene                 | 3.41                 | 1.42    | 0.96    | 0.46    |
| 6   | 2-menthene                      | 1.87                 | nd      | nd      | nd      |
| 7   | $\alpha$ -phellandrene          | 19.04                | 20.49   | 4.71    | 3.20    |
| 8   | $\delta^3$ -carene              | 0.19                 | nd      | nd      | nd      |
| 9   | $\alpha$ -terpinene             | 2.92                 | 1.14    | 1.16    | 0.03    |
| 10  | <i>p</i> -cymene                | 9.26                 | 6.51    | 14.90   | 10.65   |
| 11  | limonene                        | 10.70                | 25.22   | 17.36   | 48.36   |
| 12  | $\beta$ -phellandrene           | 2.20                 | nd      | nd      | nd      |
| 13  | eucalyptol                      | 0.12                 | 3.66    | 1.96    | 3.07    |
| 14  | $\gamma$ -terpinene             | 1.68                 | 0.76    | 1.93    | 0.06    |
| 15  | 4-thujanol                      | 0.09                 | nd      | nd      | nd      |
| 16  | terpinolene                     | 32.17                | 1.04    | 16.44   | 0.20    |
| 17  | <i>p</i> -cymenene              | 0.25                 | nd      | nd      | nd      |
| 18  | terpinen-4-ol                   | 0.55                 | 0.53    | 0.20    | 0.44    |
| 19  | <i>p</i> -cymen-8-ol            | 0.92                 | nd      | nd      | nd      |
| 20  | $\alpha$ -terpineol             | 0.26                 | 9.09    | 4.71    | 24.31   |
| 21  | <i>cis</i> -thujanol            | nd                   | 0.99    | 0.80    | 0.23    |
| 22  | $\beta$ -caryophyllene          | nd                   | 0.66    | nd      | nd      |
| 23  | <i>trans</i> - $\beta$ -ocimene | nd                   | 0.21    | 0.14    | 0.25    |
| 24  | $\alpha$ -dihydroterpineol      | nd                   | 0.21    | nd      | nd      |
| 25  | <i>trans</i> -thujanol          | nd                   | 0.11    | 0.26    | 0.10    |
| 26  | camphor                         | nd                   | 0.09    | nd      | nd      |
| 27  | <i>cis</i> -2-menthenol         | nd                   | 0.08    | 0.26    | nd      |
| 28  | humulene                        | nd                   | 0.07    | nd      | nd      |
| 29  | <i>trans</i> -2-menthenol       | nd                   | 0.06    | 0.04    | nd      |
| 30  | cyperene                        | nd                   | 0.05    | nd      | nd      |
| 31  | pipertone                       | nd                   | 0.04    | nd      | 0.06    |
| 32  | 2-(4-methylphenyl)propan-2-ol   | nd                   | nd      | 2.92    | nd      |

**Tables S2.** *In chemico* assessment of skin sensitization (raw data)

|                                                               | Negative control    |            | Positive control 1  |            | Positive control 2  |            | EO                  |            |
|---------------------------------------------------------------|---------------------|------------|---------------------|------------|---------------------|------------|---------------------|------------|
| Cysteine peptide assays                                       | (-)peptide          | (+)peptide | (-)peptide          | (+)peptide | (-)peptide          | (+)peptide | (-)peptide          | (+)peptide |
| FI <sub>1</sub>                                               | 2196                | 32857      | 1048                | 9535       | 2167                | 14238      | 2252                | 17223      |
| FI <sub>2</sub>                                               | 2268                | 32878      | 1041                | 9755       | 2145                | 14224      | 2201                | 16943      |
| FI <sub>3</sub>                                               | 2269                | 32742      | 1053                | 9637       | 2152                | 13763      | 2234                | 17005      |
| Mean                                                          | 2244                | 32826      | 1047                | 9642       | 2155                | 14075      | 2229                | 17057      |
| St. Dev.                                                      | 42                  | 73         | 6                   | 110        | 11                  | 270        | 26                  | 147        |
| FI <sub>corr</sub> = [FI <sub>(+)</sub> – FI <sub>(-)</sub> ] | FI <sub>corr</sub>  | 30581      | FI <sub>corr</sub>  | 8595       | FI <sub>corr</sub>  | 11920      | FI <sub>corr</sub>  | 14828      |
| Peptide depletion                                             | PD <sub>Cyst.</sub> | -          | PD <sub>Cyst.</sub> | 71.9%      | PD <sub>Cyst.</sub> | 61.0%      | PD <sub>Cyst.</sub> | 51.5%      |

| Calibration curve |      |       |
|-------------------|------|-------|
| Cyst.             | μM   | FI    |
| Std 0             | 0    | 2199  |
| Std 1             | 6.25 | 3584  |
| Std 2             | 12.5 | 4735  |
| Std 3             | 25   | 6491  |
| Std 4             | 50   | 10171 |
| Std 5             | 100  | 17946 |
| Std 6             | 200  | 32831 |

|                                                               | Negative control   |            | Positive control 1 |            | Positive control 2 |            | EO                 |            |
|---------------------------------------------------------------|--------------------|------------|--------------------|------------|--------------------|------------|--------------------|------------|
| Lysine peptide assays                                         | (-)peptide         | (+)peptide | (-)peptide         | (+)peptide | (-)peptide         | (+)peptide | (-)peptide         | (+)peptide |
| FI <sub>1</sub>                                               | 1684               | 30925      | 729                | 2972       | 1568               | 18024      | 1624               | 28819      |
| FI <sub>2</sub>                                               | 1687               | 31465      | 718                | 3040       | 1587               | 17586      | 1581               | 28231      |
| FI <sub>3</sub>                                               | 1673               | 31726      | 762                | 3003       | 1582               | 17834      | 1553               | 27930      |
| Mean                                                          | 1681               | 31372      | 736                | 3005       | 1579               | 17815      | 1586               | 28327      |
| St. Dev.                                                      | 7                  | 409        | 23                 | 34         | 10                 | 220        | 36                 | 452        |
| FI <sub>corr</sub> = [FI <sub>(+)</sub> – FI <sub>(-)</sub> ] | FI <sub>corr</sub> | 29691      | FI <sub>corr</sub> | 2269       | FI <sub>corr</sub> | 16236      | FI <sub>corr</sub> | 26741      |
| Peptide depletion                                             | PD <sub>Lys.</sub> | -          | PD <sub>Lys.</sub> | 92.4%      | PD <sub>Lys.</sub> | 45.3%      | PD <sub>Lys.</sub> | 9.9%       |

| Calibration curve |       |         |
|-------------------|-------|---------|
| Lys.              | μM    | FI      |
| Std 0             | 0     | 1627.5  |
| Std 1             | 3.125 | 2388.5  |
| Std 2             | 6.25  | 3413    |
| Std 3             | 12.5  | 5515.5  |
| Std 4             | 25    | 9171    |
| Std 5             | 50    | 16819   |
| Std 6             | 100   | 31330.5 |

**Tables S3.** *In vitro* assessment of skin sensitization (raw data)

| Cytotoxicity assay on THP1 cells – 24hrs treatment |         |         |        |        |       |       |       |       |       |      |
|----------------------------------------------------|---------|---------|--------|--------|-------|-------|-------|-------|-------|------|
| EO (mg/mL)                                         | Control | 0.00005 | 0.0001 | 0.0005 | 0.001 | 0.005 | 0.01  | 0.05  | 0.1   | 0.2  |
| FI-1 <sub>corr</sub>                               | 40872   | 41024   | 40080  | 39830  | 39482 | 38235 | 37337 | 34986 | 27907 | 7315 |
| FI-2 <sub>corr</sub>                               | 41096   | 40761   | 40382  | 39868  | 39139 | 38732 | 37069 | 34504 | 27541 | 7440 |
| FI-3 <sub>corr</sub>                               | 40930   | 40818   | 40546  | 39874  | 39436 | 38591 | 37192 | 35108 | 28019 | 7338 |
| Mean                                               | 40966   | 40868   | 40336  | 39858  | 39353 | 38520 | 37200 | 34866 | 27823 | 7365 |
| St. Dev.                                           | 116     | 138     | 236    | 24     | 186   | 256   | 134   | 319   | 250   | 67   |
| Viability (%)                                      | 100     | 100     | 98     | 97     | 96    | 94    | 91    | 85    | 68    | 18   |
| Cytotoxicity (%)                                   | -       | 0       | 2      | 3      | 4     | 6     | 9     | 15    | 32    | 82   |

| Cytotoxicity assay on THP1 cells – 24hrs treatment |         |       |       |       |       |       |       |       |       |       |
|----------------------------------------------------|---------|-------|-------|-------|-------|-------|-------|-------|-------|-------|
| EO (mg/mL)                                         | Control | 0.010 | 0.013 | 0.018 | 0.024 | 0.032 | 0.042 | 0.056 | 0.075 | 0.1   |
| FI-1 <sub>corr</sub>                               | 40589   | 38788 | 38263 | 37665 | 37640 | 36710 | 35768 | 34033 | 31007 | 25738 |
| FI-2 <sub>corr</sub>                               | 40554   | 38097 | 37858 | 37181 | 36290 | 35967 | 35671 | 34131 | 31412 | 25753 |
| FI-3 <sub>corr</sub>                               | 40768   | 38302 | 37605 | 37697 | 37356 | 35681 | 35681 | 34210 | 31108 | 25539 |
| FI-4 <sub>corr</sub>                               | 41098   | 37960 | 37963 | 37841 | 36966 | 36078 | 36078 | 33929 | 31238 | 25999 |
| Mean                                               | 40752   | 38287 | 37922 | 37596 | 37063 | 36634 | 35799 | 34076 | 31191 | 25757 |
| St. Dev.                                           | 249     | 363   | 272   | 287   | 585   | 518   | 191   | 122   | 175   | 188   |
| Viability (%)                                      | 100     | 94    | 93    | 92    | 91    | 90    | 88    | 84    | 77    | 63    |
| Cytotoxicity (%)                                   | -       | 6     | 7     | 8     | 9     | 10    | 12    | 16    | 23    | 37    |

CD86 expression assay on THP1 cells – 24hrs treatment

|                       | Control | Contr. <sub>EtOH</sub> | PC             | EO mg/mL |       |       |       |       |       |
|-----------------------|---------|------------------------|----------------|----------|-------|-------|-------|-------|-------|
| CD86 assay            | -       | EtOH<br>(0.2%)         | DCNB<br>5µg/mL | 0.036    | 0.043 | 0.052 | 0.063 | 0.075 | 0.090 |
| OD <sub>mes.1</sub>   | 0.226   | 0.236                  | 0.761          | 0.358    | 0.417 | 0.543 | 0.598 | 0.614 | 0.627 |
| OD <sub>mes.2</sub>   | 0.210   | 0.233                  | 0.743          | 0.340    | 0.440 | 0.558 | 0.587 | 0.608 | 0.643 |
| OD <sub>mes.3</sub>   | 0.225   | 0.239                  | 0.792          | 0.343    | 0.410 | 0.567 | 0.608 | 0.632 | 0.625 |
| Mean                  | 0.220   | 0.236                  | 0.766          | 0.347    | 0.422 | 0.556 | 0.598 | 0.618 | 0.632 |
| St. Dev.              | 0.009   | 0.003                  | 0.025          | 0.010    | 0.016 | 0.012 | 0.011 | 0.012 | 0.010 |
| OD <sub>CD86</sub>    |         |                        |                |          |       |       |       |       |       |
| Mean                  | 0.424   | 0.485                  | 2.604          | 0.930    | 1.232 | 1.767 | 1.933 | 2.014 | 2.069 |
| St. Dev.              | 0.036   | 0.013                  | 0.100          | 0.038    | 0.062 | 0.049 | 0.042 | 0.049 | 0.039 |
| Resazurin assay       | -       | EtOH<br>(0.2%)         | DNCB<br>5µg/mL | 0.036    | 0.043 | 0.052 | 0.063 | 0.075 | 0.090 |
| FI <sub>mes.1</sub>   | 43401   | 43364                  | 34974          | 38929    | 38050 | 36392 | 35889 | 34240 | 33455 |
| FI <sub>mes.2</sub>   | 43179   | 43152                  | 35495          | 39383    | 37827 | 36915 | 34867 | 33926 | 32900 |
| FI <sub>mes.3</sub>   | 43417   | 42822                  | 35043          | 39492    | 37610 | 36649 | 35223 | 34249 | 33432 |
| Mean                  | 43332   | 43113                  | 35171          | 39268    | 37829 | 36652 | 35326 | 34138 | 33262 |
| St. Dev.              | 133     | 273                    | 283            | 299      | 220   | 262   | 519   | 184   | 314   |
| Viability (% Control) |         |                        |                |          |       |       |       |       |       |
| Mean                  | 100     | 100                    | 80             | 90       | 87    | 84    | 81    | 78    | 75    |
| St. Dev.              | 0.68    | 0.68                   | 0.70           | 0.74     | 0.55  | 0.65  | 1.29  | 0.46  | 0.78  |
| CD86 (%)              |         |                        |                |          |       |       |       |       |       |
| Mean                  | 100     | 100                    | 770            | 212      | 292   | 434   | 494   | 534   | 565   |
| St. Dev.              | 3.25    | 3.25                   | 34.69          | 10.42    | 14.53 | 10.31 | 11.07 | 11.03 | 16.63 |

CD54 expression assay on THP1 cells – 24hrs treatment

|                       | Control | Contr. <sub>EtOH</sub> | PC             | EO mg/mL |       |       |       |       |       |
|-----------------------|---------|------------------------|----------------|----------|-------|-------|-------|-------|-------|
| CD54 assay            | -       | EtOH<br>(0.2%)         | DCNB<br>5µg/mL | 0.036    | 0.043 | 0.052 | 0.063 | 0.075 | 0.090 |
| OD <sub>mes.1</sub>   | 0.279   | 0.252                  | 0.794          | 0.552    | 0.567 | 0.590 | 0.671 | 0.700 | 0.712 |
| OD <sub>mes.2</sub>   | 0.262   | 0.280                  | 0.819          | 0.540    | 0.585 | 0.637 | 0.701 | 0.707 | 0.711 |
| OD <sub>mes.3</sub>   | 0.268   | 0.264                  | 0.793          | 0.538    | 0.582 | 0.597 | 0.681 | 0.711 | 0.702 |
| Mean                  | 0.270   | 0.265                  | 0.802          | 0.543    | 0.578 | 0.608 | 0.684 | 0.706 | 0.708 |
| St. Dev.              | 0.009   | 0.014                  | 0.015          | 0.007    | 0.010 | 0.026 | 0.015 | 0.005 | 0.006 |
| OD <sub>CD54</sub>    |         |                        |                |          |       |       |       |       |       |
| Mean                  | 0.614   | 0.597                  | 2.743          | 1.708    | 1.848 | 1.968 | 2.272 | 2.360 | 2.368 |
| St. Dev.              | 0.036   | 0.057                  | 0.060          | 0.030    | 0.039 | 0.102 | 0.062 | 0.022 | 0.023 |
| Resazurin assay       | -       | EtOH<br>(0.2%)         | DNCB<br>5µg/mL | 0.036    | 0.043 | 0.052 | 0.063 | 0.075 | 0.090 |
| FI <sub>mes.1</sub>   | 43401   | 43364                  | 34974          | 38929    | 38050 | 36392 | 35889 | 34240 | 33455 |
| FI <sub>mes.2</sub>   | 43179   | 43152                  | 35495          | 39383    | 37827 | 36915 | 34867 | 33926 | 32900 |
| FI <sub>mes.3</sub>   | 43417   | 42822                  | 35043          | 39492    | 37610 | 36649 | 35223 | 34249 | 33432 |
| Mean                  | 43332   | 43113                  | 35171          | 39268    | 37829 | 36652 | 35326 | 34138 | 33262 |
| St. Dev.              | 133     | 273                    | 283            | 299      | 220   | 262   | 519   | 184   | 314   |
| Viability (% Control) |         |                        |                |          |       |       |       |       |       |
| Mean                  | 100     | 100                    | 80             | 90       | 87    | 84    | 81    | 78    | 75    |
| St. Dev.              | 0.68    | 0.68                   | 0.70           | 0.74     | 0.55  | 0.65  | 1.29  | 0.46  | 0.78  |
| CD54 (%)              |         |                        |                |          |       |       |       |       |       |
| Mean                  | 100     | 100                    | 560            | 316      | 356   | 392   | 471   | 509   | 525   |
| St. Dev.              | 5.58    | 9.69                   | 7.31           | 8.12     | 9.26  | 17.51 | 20.04 | 5.92  | 8.98  |

THP1 cell line reactivity control – CD86 expression assay on THP1 cells – 24hrs treatment

|                       | Control | PC1   | PC2               |
|-----------------------|---------|-------|-------------------|
| CD86 assay            | -       | DNCB  | NiSO <sub>4</sub> |
| OD <sub>mes.1</sub>   | 0.187   | 0.870 | 0.788             |
| OD <sub>mes.2</sub>   | 0.198   | 0.883 | 0.805             |
| OD <sub>mes.3</sub>   | 0.187   | 0.863 | 0.785             |
| Mean                  | 0.191   | 0.873 | 0.793             |
| St. Dev.              | 0.006   | 0.010 | 0.011             |
| OD <sub>CD86</sub>    |         |       |                   |
| Mean                  | 0.320   | 3.045 | 2.729             |
| St. Dev.              | 0.025   | 0.041 | 0.043             |
| Resazurin assay       | -       | DNCB  | NiSO <sub>4</sub> |
| FI <sub>mes.1</sub>   | 42990   | 34704 | 36305             |
| FI <sub>mes.2</sub>   | 43385   | 34107 | 36812             |
| FI <sub>mes.3</sub>   | 42954   | 34143 | 36997             |
| Mean                  | 43113   | 34318 | 36705             |
| St. Dev.              | 236     | 335   | 358               |
| Viability (% Control) |         |       |                   |
| Mean                  | 100     | 78    | 84                |
| St. Dev.              | 0.59    | 0.83  | 0.89              |
| CD86 (%)              |         |       |                   |
| Mean                  | 100     | 1219  | 1015              |
| St. Dev.              | 7.33    | 22.80 | 18.24             |

|                       | Control | NC1   |
|-----------------------|---------|-------|
| CD86 assay            | -       | LA    |
| OD <sub>mes.1</sub>   | 0.187   | 0.210 |
| OD <sub>mes.2</sub>   | 0.198   | 0.241 |
| OD <sub>mes.3</sub>   | 0.187   | 0.209 |
| Mean                  | 0.191   | 0.220 |
| St. Dev.              | 0.006   | 0.018 |
| OD <sub>CD86</sub>    |         |       |
| Mean                  | 0.320   | 0.437 |
| St. Dev.              | 0.025   | 0.072 |
| XTT assay             | -       | LA    |
| OD <sub>mes.1</sub>   | 0.527   | 0.541 |
| OD <sub>mes.2</sub>   | 0.559   | 0.544 |
| OD <sub>mes.3</sub>   | 0.537   | 0.556 |
| Mean                  | 0.541   | 0.547 |
| St. Dev.              | 0.016   | 0.008 |
| Viability (% Control) |         |       |
| Mean                  | 100     | 102   |
| St. Dev.              | 3.46    | 1.75  |
| CD86 (%)              |         |       |
| Mean                  | 100     | 135   |
| St. Dev.              | 4.70    | 23.12 |

THP1 cell line reactivity control – CD54 expression assay on THP1 cells – 24hrs treatment

|                       | Control | PC1   | PC2               |
|-----------------------|---------|-------|-------------------|
| CD54 assay            | -       | DNCB  | NiSO <sub>4</sub> |
| OD <sub>mes.1</sub>   | 0.238   | 0.739 | 0.894             |
| OD <sub>mes.2</sub>   | 0.216   | 0.723 | 0.854             |
| OD <sub>mes.3</sub>   | 0.224   | 0.663 | 0.893             |
| Mean                  | 0.226   | 0.708 | 0.880             |
| St. Dev.              | 0.011   | 0.040 | 0.023             |
| OD <sub>CD54</sub>    |         |       |                   |
| Mean                  | 0.471   | 2.401 | 3.088             |
| St. Dev.              | 0.045   | 0.163 | 0.091             |
| Resazurin assay       | -       | DNCB  | NiSO <sub>4</sub> |
| FI <sub>mes.1</sub>   | 42990   | 34704 | 36305             |
| FI <sub>mes.2</sub>   | 43385   | 34107 | 36812             |
| FI <sub>mes.3</sub>   | 42954   | 34143 | 36997             |
| Mean                  | 43113   | 34318 | 36705             |
| St. Dev.              | 236     | 335   | 358               |
| Viability (% Control) |         |       |                   |
| Mean                  | 100     | 78    | 84                |
| St. Dev.              | 0.59    | 0.83  | 0.89              |
| CD54 (%)              |         |       |                   |
| Mean                  | 100     | 653   | 780               |
| St. Dev.              | 9.94    | 40.08 | 26.74             |

|                     | Control | NC1   |
|---------------------|---------|-------|
| CD54 assay          | -       | LA    |
| OD <sub>mes.1</sub> | 0.238   | 0.182 |
| OD <sub>mes.2</sub> | 0.216   | 0.174 |
| OD <sub>mes.3</sub> | 0.224   | 0.223 |
| Mean                | 0.226   | 0.193 |
| St. Dev.            | 0.011   | 0.026 |

|                       |       |       |
|-----------------------|-------|-------|
| OD <sub>CD54</sub>    |       |       |
| Mean                  | 0.471 | 0.338 |
| St. Dev.              | 0.045 | 0.105 |
| XTT assay             | -     | LA    |
| OD <sub>mes.1</sub>   | 0.527 | 0.541 |
| OD <sub>mes.2</sub>   | 0.559 | 0.544 |
| OD <sub>mes.3</sub>   | 0.537 | 0.556 |
| Mean                  | 0.541 | 0.547 |
| St. Dev.              | 0.016 | 0.008 |
| Viability (% Control) |       |       |
| Mean                  | 100   | 102   |
| St. Dev.              | 3.46  | 1.75  |
| CD54 (%)              |       |       |
| Mean                  | 100   | 70    |
| St. Dev.              | 12.78 | 20.50 |
